# Supplementary material
Source: publisher figshare collection journal article supplement (https://acs.figshare.com/ndownloader/files/4721383)
Supplement: Supplementary file 1 [file 4721383]

**DOES AROMATICITY IN A REACTION PRODUCT INCREASE OR  
DECREASE THE INTRINSIC BARRIER? KINETICS OF THE  
REVERSIBLE DEPROTONATION OF BENZOFURAN-3(2H)-ONE  
AND BENZOTHIOPHENE-3(2H)-ONE**

Claude F. Bernasconi and Moisés Pérez-Lorenzo

Supporting Information

**Table of Contents**

|                  | page                                                                                                                |
|------------------|---------------------------------------------------------------------------------------------------------------------|
| <b>Figure S1</b> | Spectrophotometric $pK_a^{KH}$ determination for <b>3H-O</b> . S3                                                   |
| <b>Figure S2</b> | Reaction of <b>3H-O</b> with piperidine. S4                                                                         |
| <b>Figure S3</b> | Reaction of <b>3H-O</b> with piperidine. Plot of slopes versus $a_{H^+}$ according to eq 9. S5                      |
| <b>Figure S4</b> | Reaction of <b>3H-O</b> with glycineamide. Plot of slope <sup>-1</sup> versus $a_{H^+}^{-1}$ according to eq 11. S6 |
| <b>Figure S5</b> | Reaction of <b>3H-S</b> with HEPA. S7                                                                               |

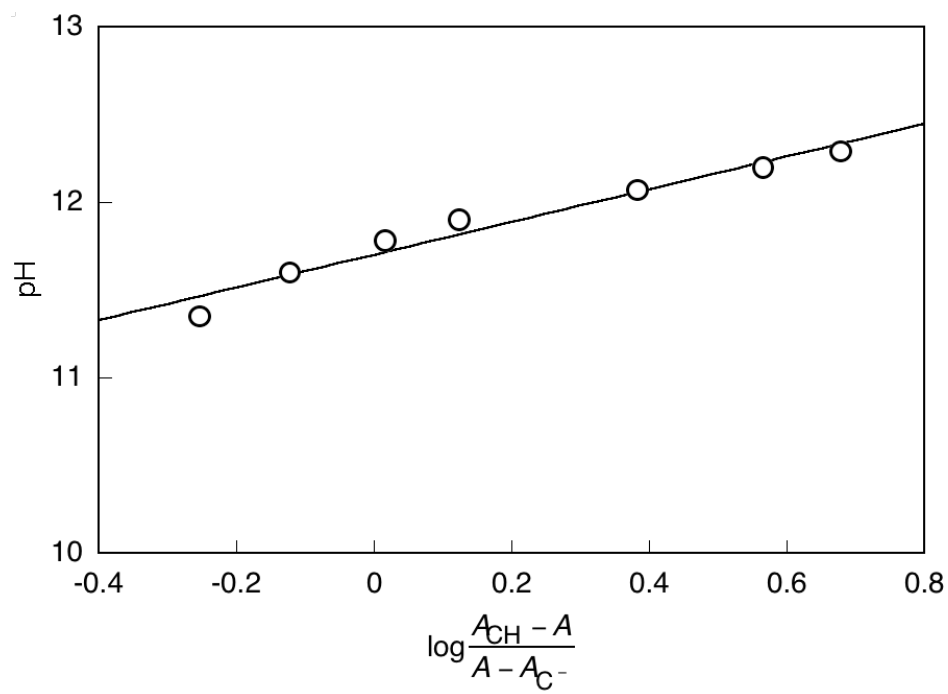

**Figure S1.** Spectrophotometric  $pK_a^{KH}$  determination for **3H-O**.

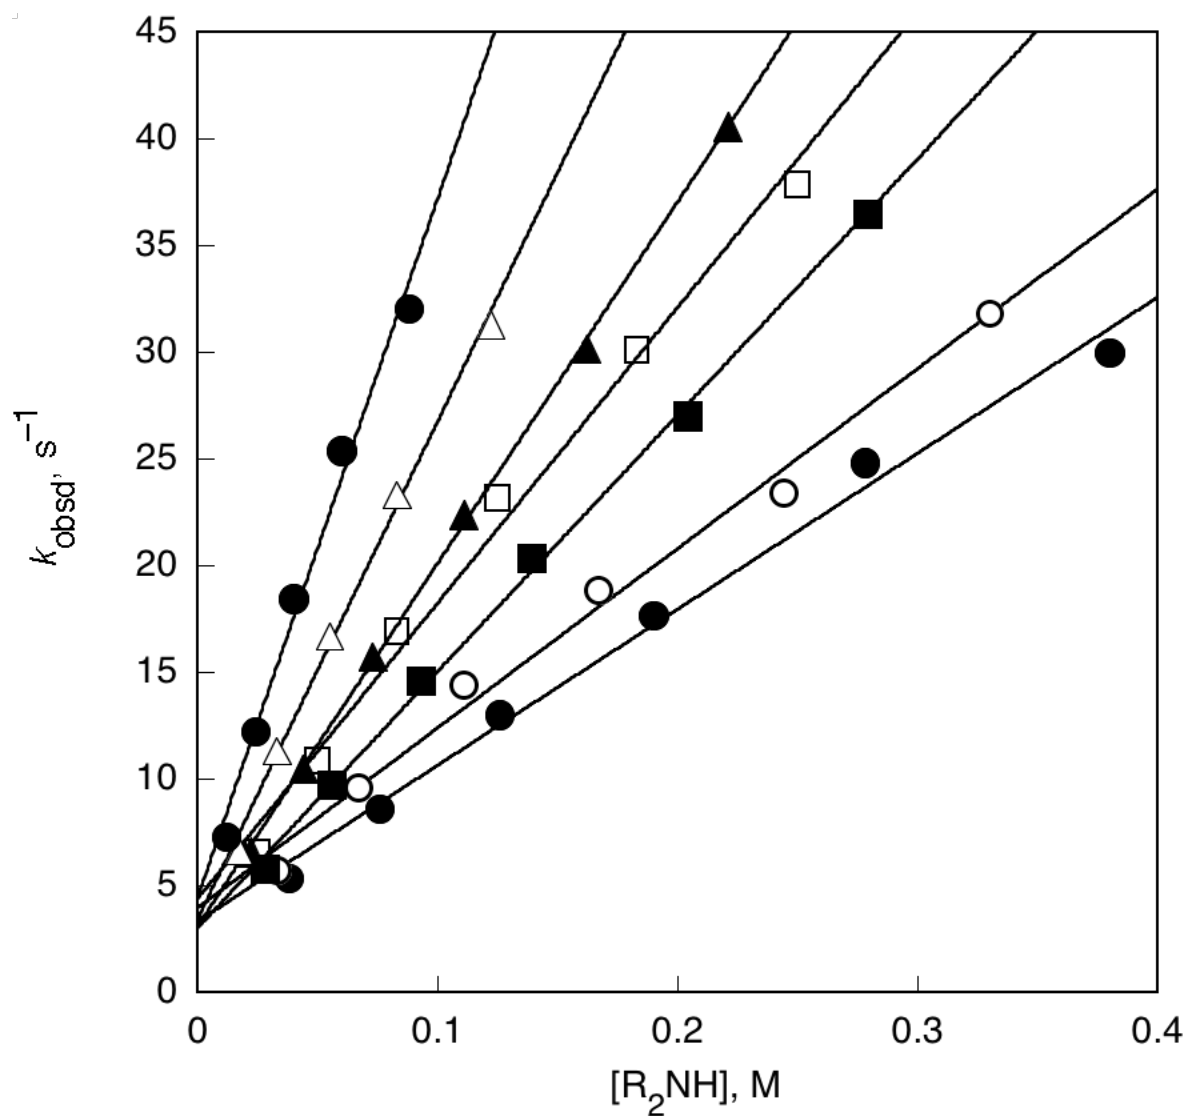

**Figure S2.** Reaction of **3H-O** with piperidine: J, pH 10.89; C, pH 11.09; H, pH 11.29; G, pH 11.39; B, pH 11.49; E, pH 11.69; J, pH 11.89.

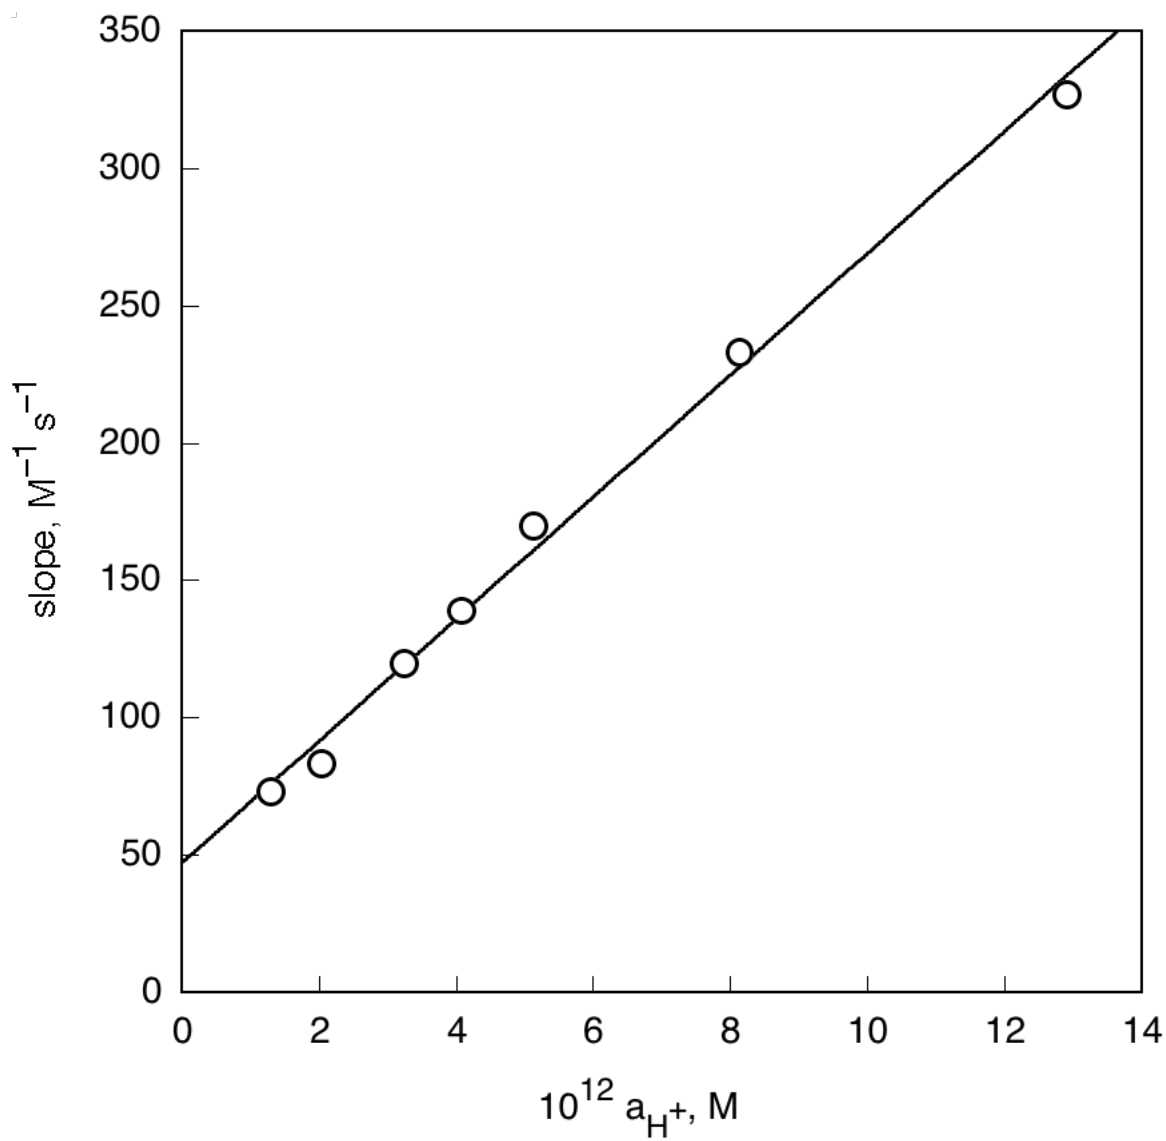

**Figure S3.** Reaction of **3H-O** with piperidine. Plot of slopes versus  $a_{\text{H}^+}$  according to eq 10.

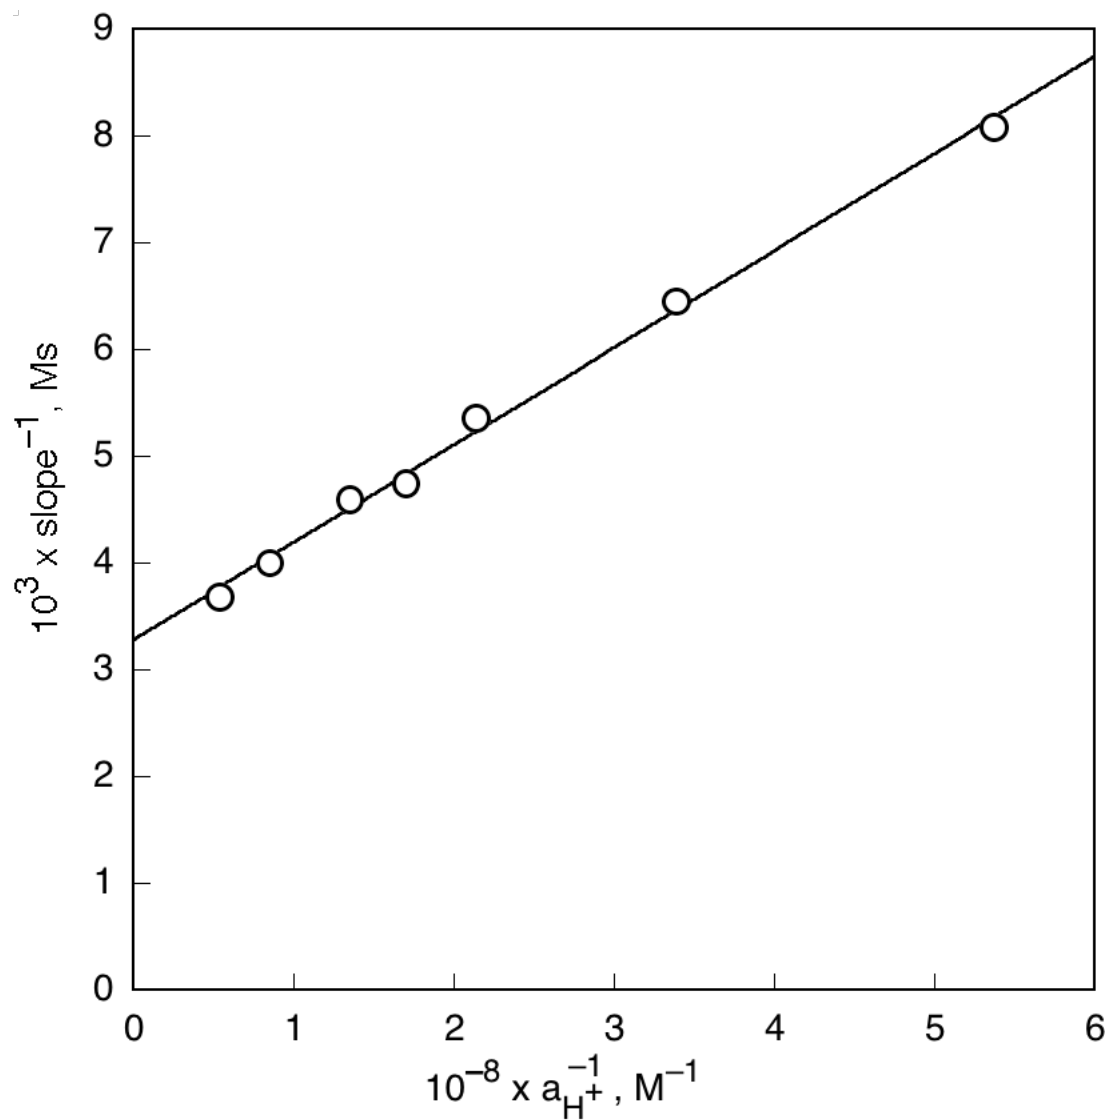

**Figure S4.** Reaction of **3H-O** with glycinamide. Plot of  $\text{slope}^{-1}$  versus  $a_{\text{H}^+}^{-1}$  according to eq 12.

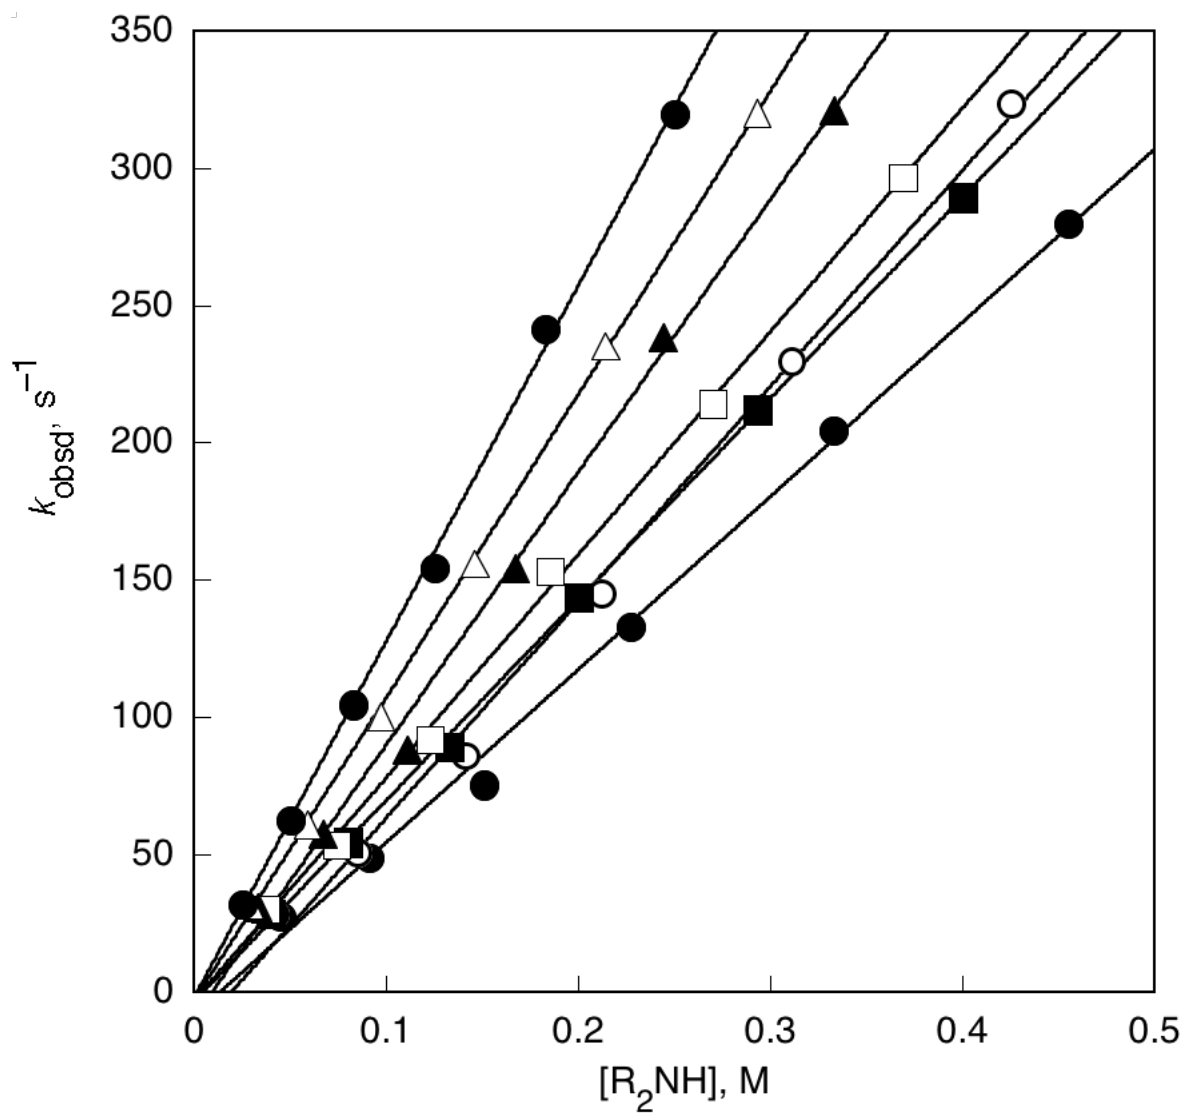

**Figure S5.** Reaction of **3H-S** with HEPA: J, pH 9.43; C, pH 9.58; H, pH 9.73; G, pH 9.88, B, pH 10.03; E, pH 10.18; J, pH 10.43.
